# Supplementary material for: RECAPDOC - a questionnaire for the documentation of rehabilitation care utilization in individuals with disorders of consciousness in long-term care in Germany: development and pretesting
Source: PubMed Central journal article supplement (PMC5936017; doi:10.1186/s12913-018-3153-3), 2018-05-04
Supplement: 12913_2018_3153_MOESM3_ESM.pdf [file 12913_2018_3153_MOESM3_ESM.pdf]

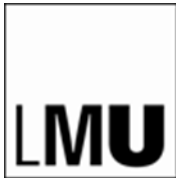

LUDWIG-  
MAXIMILIANS-  
UNIVERSITÄT  
MÜNCHEN

INSTITUT FÜR MEDIZINISCHE  
INFORMATIONSVERRARBEITUNG, BIOMETRIE  
UND EPIDEMIOLOGIE

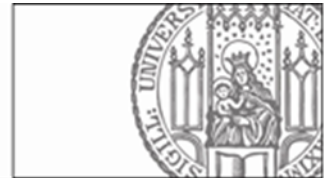

# Fragebogen zur Inanspruchnahme rehabilitativer Leistungen in der Langzeitversorgung von Menschen mit schweren Bewusstseinsstörungen

## Hinweise zum Ausfüllen des Fragebogens

© Institut für Medizinische Informationsverarbeitung, Biometrie und Epidemiologie (IBE) der  
Ludwig-Maximilians-Universität München

Kontakt: [martin.mueller@fh-rosenheim.de](mailto:martin.mueller@fh-rosenheim.de)

Gefördert durch die Deutsche Forschungsgemeinschaft

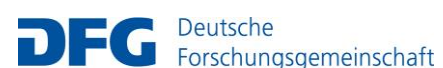

Bitte lassen Sie sich von dem Umfang des Fragebogens nicht abschrecken!  
Sie werden insgesamt etwa 20 Minuten für Ihre Antworten benötigen.

### So wird's gemacht!

Bitte füllen Sie den Fragebogen aus, indem Sie

- In den Kästchen ein Kreuz machen

*Beispiel:* Nein  Ja

- In den Feldern eintragen

*Beispiel:* durchschnittlich   1 Stunden und   3 0 Minuten

- Angaben in Druckbuchstaben auf der vorgegebenen Linie machen

*Beispiel:* Sonstige: Betreutes Wohnen

Im Fragebogen werden verschiedene Zeiträume abgefragt (3 Monate und 12 Monate). Bitte achten Sie bei den jeweiligen Fragen, auf welchen Zeitraum sich diese beziehen und nehmen Sie bitte einen **Kalender zu Hilfe**, um die zurückliegenden Zeiten zu bestimmen.

Gehen Sie bitte der Reihe nach vor und beantworten Sie wenn möglich alle Fragen.

**Vielen Dank!**

1) Welche Hauptdiagnose liegt der Bewusstseinsstörung des Betroffenen zugrunde?

Bitte Entsprechendes ankreuzen.

- Schädel-Hirn-Trauma
- Schlaganfall
- Hirnblutung (intrazerebral oder subarachnoidal)
- Sauerstoffmangel im Gehirn
- Sonstige:

2) Wann war das Datum der Schädigung des Betroffenen?

|                      |                      |                      |                      |                      |
|----------------------|----------------------|----------------------|----------------------|----------------------|
| <input type="text"/> | <input type="text"/> | <input type="text"/> | <input type="text"/> | <input type="text"/> |
| Tag                  |                      | Monat                |                      | Jahr                 |

3) Wann ist der Betroffene aus der stationären Rehabilitation entlassen worden?

|                      |                      |                      |                      |                      |
|----------------------|----------------------|----------------------|----------------------|----------------------|
| <input type="text"/> | <input type="text"/> | <input type="text"/> | <input type="text"/> | <input type="text"/> |
| Tag                  |                      | Monat                |                      | Jahr                 |

4) Wo wohnt der Betroffene **zurzeit**?

Bitte Entsprechendes ankreuzen.

- Privater Haushalt
- Senioren-/Pflegeheim
- Fachpflegeeinrichtung für Menschen mit schweren Bewusstseinsstörungen
- Betreute Wohngemeinschaft
- Sonstige:

5) Hat der Betroffene in den **letzten 3 Monaten** einen ambulanten Pflegedienst in Anspruch genommen?

Bitte Entsprechendes ankreuzen und ausfüllen.

Nein

Ja →

Wenn ja, seit wann nimmt der Betroffene den ambulanten Pflegedienst in Anspruch?

Monat        
Jahr

An wie vielen Tagen pro Woche nimmt der Betroffene den ambulanten Pflegedienst in Anspruch?

an  Tagen pro Woche

**An diesen Tagen**, wie lange war der ambulante Pflegedienst durchschnittlich bei dem Betroffenen zu Hause?

durchschnittlich  Stunden und  Minuten

6) Hat der Betroffene in den **letzten 3 Monaten** eine bezahlte Haushalts- oder Pflegehilfe in Anspruch genommen?

Bitte Entsprechendes ankreuzen und ausfüllen.

Nein

Ja →

Wenn ja, seit wann nimmt der Betroffene die bezahlte Haushalts- oder Pflegehilfe in Anspruch?

Monat        
Jahr

An wie vielen Tagen pro Woche nimmt der Betroffene die bezahlte Haushalts- oder Pflegehilfe in Anspruch?

an  Tagen pro Woche

**An diesen Tagen**, wie lange war die bezahlte Haushalts- oder Pflegehilfe durchschnittlich bei dem Betroffenen zu Hause?

durchschnittlich  Stunden und  Minuten

7) Hat der Betroffene in den **letzten 3 Monaten** Hilfen von Familienmitgliedern, Freunden, Bekannten oder Nachbarn in Anspruch genommen?

Beispiele für diese Hilfen sind: Hilfen im Haushalt, bei der Körperpflege, beim An- und Auskleiden, bei der Medikamenteneinnahme, beim Einkaufen, bei Fahrdiensten

Bitte Entsprechendes ankreuzen und ausfüllen.

Nein

Ja →

Wenn ja, seit wann nimmt der Betroffene diese Hilfen in Anspruch?

Monat      Jahr

An wie vielen Tagen pro Woche nimmt der Betroffene diese Hilfen in Anspruch?

an  Tagen pro Woche

**An diesen Tagen**, wie lange wurde dem Betroffenen durchschnittlich geholfen?

durchschnittlich  Stunden und  Minuten

8) Hatte der Betroffene in den **letzten 3 Monaten** einen Aufenthalt in einer teilstationären Pflegeeinrichtung (Tagespflege)?

Bitte Entsprechendes ankreuzen und ausfüllen.

Nein

Ja →

Wenn ja, seit wann besucht der Betroffene diese teilstationäre Pflegeeinrichtung (Tagespflege)?

Monat      Jahr

An wie vielen Tagen pro Woche besucht der Betroffene die teilstationäre Pflegeeinrichtung (Tagespflege)?

an  Tagen pro Woche

**An diesen Tagen**, wie lange besucht der Betroffene durchschnittlich die teilstationäre Pflegeeinrichtung (Tagespflege)?

durchschnittlich  Stunden und  Minuten

9) Erhält der Betroffene Leistungen aus der gesetzlichen Pflegeversicherung?

Bitte Entsprechendes ankreuzen und ausfüllen.

Nein

Ja →

Wenn ja, welche Pflegestufe hat der Betroffene?

Pflegestufe

Falls Ihnen die Pflegestufe des Betroffenen nicht bekannt ist: Wie hoch ist das monatliche Pflegegeld?

Euro

Falls der Betroffene in Pflegestufe 3 eingruppiert ist: Wird die **Härtefallregelung** (höhere Sachleistungen) in Anspruch genommen?

Härtefallregelung:    Nein     Ja     Weiß nicht

10) Erhält der Betroffene Leistungen aus der gesetzlichen Unfallversicherung?

Bitte Entsprechendes ankreuzen.

Nein

Ja

11) Wie ist der Betroffene krankenversichert?

Bitte Entsprechendes ankreuzen.

Gesetzlich Versichert

Über Beihilfe und privat versichert (Beamtenstatus)

Privat versichert (nur Vollversicherung, keine Zusatzversicherung)

Keine Krankenversicherung

**12) Hat der Betroffene in den letzten 3 Monaten einen der folgenden Ärzte aufgesucht?**

Gemeint ist jeder Kontakt mit der Arztpraxis, auch wenn der Arzt selbst nicht gesprochen wurde (zum Beispiel Rezept abholen, Blutabnahme). Hausbesuche zählen auch dazu.

Bitte kreuzen Sie zunächst an, ob der Betroffene den jeweiligen Arzt aufgesucht hat (Ja oder Nein).

Wenn ja, dann geben Sie bitte weiterhin an, wie oft der Betroffene diesen Arzt aufgesucht hat.

| Arzt                                                                                                           | Nein                     | Ja                       | Wie oft?                                  |
|----------------------------------------------------------------------------------------------------------------|--------------------------|--------------------------|-------------------------------------------|
| Allgemeinmediziner, Hausarzt oder hausärztlicher Internist                                                     | <input type="checkbox"/> | <input type="checkbox"/> | <input type="text"/> <input type="text"/> |
| Fachärztlicher Internist (z.B. Kardiologe, Gastroenterologe, Nephrologe, Diabetologe, Pulmologe, usw.)         | <input type="checkbox"/> | <input type="checkbox"/> | <input type="text"/> <input type="text"/> |
| Gynäkologe                                                                                                     | <input type="checkbox"/> | <input type="checkbox"/> | <input type="text"/> <input type="text"/> |
| Chirurg                                                                                                        | <input type="checkbox"/> | <input type="checkbox"/> | <input type="text"/> <input type="text"/> |
| Orthopäde                                                                                                      | <input type="checkbox"/> | <input type="checkbox"/> | <input type="text"/> <input type="text"/> |
| Neurologe / Psychiater                                                                                         | <input type="checkbox"/> | <input type="checkbox"/> | <input type="text"/> <input type="text"/> |
| Hautarzt                                                                                                       | <input type="checkbox"/> | <input type="checkbox"/> | <input type="text"/> <input type="text"/> |
| Augenarzt                                                                                                      | <input type="checkbox"/> | <input type="checkbox"/> | <input type="text"/> <input type="text"/> |
| Urologe                                                                                                        | <input type="checkbox"/> | <input type="checkbox"/> | <input type="text"/> <input type="text"/> |
| Zahnarzt                                                                                                       | <input type="checkbox"/> | <input type="checkbox"/> | <input type="text"/> <input type="text"/> |
| Psychotherapeut                                                                                                | <input type="checkbox"/> | <input type="checkbox"/> | <input type="text"/> <input type="text"/> |
| Ambulante Behandlung im Krankenhaus (z.B. Sprechstunde, Notfallversorgung, Vor- und Nachsorge bei Operationen) | <input type="checkbox"/> | <input type="checkbox"/> | <input type="text"/> <input type="text"/> |
| An eine Klinik angebundene Spezialambulanz für Menschen mit schweren Bewusstseinsstörungen                     | <input type="checkbox"/> | <input type="checkbox"/> | <input type="text"/> <input type="text"/> |
| Sonstige: <input type="text"/>                                                                                 | <input type="checkbox"/> | <input type="checkbox"/> | <input type="text"/> <input type="text"/> |

**13) Wurde bei dem Betroffenen in den letzten 3 Monaten eine Hirnstrommessung (EEG, Elektroenzephalografie) durchgeführt?**

Bitte Entsprechendes ankreuzen.

Nein

Ja

**14)** Besitzt der Betroffene eines oder mehrere der folgenden **Hilfsmittel**? Dies schließt gekaufte oder geliehene Hilfsmittel ein.

Bitte kreuzen Sie zunächst jeweils an, ob der Betroffene das Hilfsmittel besitzt.

Wenn ja, geben Sie bitte weiterhin an, ob der Betroffene das Hilfsmittel in den **letzten 3 Monaten** verwendet hat.

| Hilfsmittel                                     | Nein                     | Ja, besitzt dieses       | Ja, in den letzten 3 Monaten verwendet |
|-------------------------------------------------|--------------------------|--------------------------|----------------------------------------|
| Rollstuhl, Multifunktions- oder Pflegerollstuhl | <input type="checkbox"/> | <input type="checkbox"/> | <input type="checkbox"/>               |
| Transferhilfen z.B. Lifter                      | <input type="checkbox"/> | <input type="checkbox"/> | <input type="checkbox"/>               |
| Stehhilfen z.B. Stehständer                     | <input type="checkbox"/> | <input type="checkbox"/> | <input type="checkbox"/>               |
| Gehhilfen z.B. Rollator                         | <input type="checkbox"/> | <input type="checkbox"/> | <input type="checkbox"/>               |
| Badehilfen z.B. Dusch- oder Badewannenliege     | <input type="checkbox"/> | <input type="checkbox"/> | <input type="checkbox"/>               |
| WC-Hilfen z.B. WC-Stuhl                         | <input type="checkbox"/> | <input type="checkbox"/> | <input type="checkbox"/>               |
| Behindertengerechtes Bett (höhenverstellbar)    | <input type="checkbox"/> | <input type="checkbox"/> | <input type="checkbox"/>               |
| Lagerungshilfen z.B. Kissen, Keile              | <input type="checkbox"/> | <input type="checkbox"/> | <input type="checkbox"/>               |
| Hilfsmittel bei Tracheostoma                    | <input type="checkbox"/> | <input type="checkbox"/> | <input type="checkbox"/>               |
| Sekret-Absauggerät                              | <input type="checkbox"/> | <input type="checkbox"/> | <input type="checkbox"/>               |
| Beatmungsgerät                                  | <input type="checkbox"/> | <input type="checkbox"/> | <input type="checkbox"/>               |
| Inhalationsgerät                                | <input type="checkbox"/> | <input type="checkbox"/> | <input type="checkbox"/>               |
| Ernährungssonde z.B. PEG-Sonde                  | <input type="checkbox"/> | <input type="checkbox"/> | <input type="checkbox"/>               |
| Ernährungspumpe z.B. PEG-Pumpe                  | <input type="checkbox"/> | <input type="checkbox"/> | <input type="checkbox"/>               |
| Kommunikationshilfen z.B. technisch, symbolisch | <input type="checkbox"/> | <input type="checkbox"/> | <input type="checkbox"/>               |
| Orthesen oder Schienen                          | <input type="checkbox"/> | <input type="checkbox"/> | <input type="checkbox"/>               |
| Hilfsmittel zur Inkontinenzversorgung           | <input type="checkbox"/> | <input type="checkbox"/> | <input type="checkbox"/>               |
| Sonstige: _____                                 | <input type="checkbox"/> | <input type="checkbox"/> | <input type="checkbox"/>               |
| Sonstige: _____                                 | <input type="checkbox"/> | <input type="checkbox"/> | <input type="checkbox"/>               |



15) Hat der Betroffene in den **letzten 3 Monaten Physiotherapie** in Anspruch genommen?  
Hausbesuche zählen auch dazu.

Bitte Entsprechendes ankreuzen.

- Nein —————> dann weiter mit Frage 18)
- Ja —————> dann weiter mit Frage 16)

16) Wenn der Betroffene in den **letzten 3 Monaten Physiotherapie** in Anspruch genommen hat, beantworten Sie bitte folgende Fragen zum zeitlichen Umfang der Behandlung?

Bitte Entsprechendes ankreuzen und ausfüllen.

Seit wann nimmt der Betroffene Physiotherapie in Anspruch?

Monat                      Jahr

An wie vielen Tagen pro Woche nimmt der Betroffene Physiotherapie in Anspruch?

an  Tagen pro Woche

**An diesen Tagen**, wie lange dauert die Physiotherapie durchschnittlich?

durchschnittlich  Stunden und  Minuten

Wird die Physiotherapie langfristig verordnet d.h. außerhalb des Regelfalles und **ohne** mindestens dreimonatige Therapiepausen?

Nein                       Ja

**17) Als Angehörige**, wie beurteilen Sie folgende Aussagen bezüglich der **Physiotherapie** des Betroffenen?

Bitte Entsprechendes ankreuzen.

| <b>Durch die Physiotherapie...</b>                                                     | trifft zu                | trifft eher zu           | trifft eher nicht zu     | trifft nicht zu          |
|----------------------------------------------------------------------------------------|--------------------------|--------------------------|--------------------------|--------------------------|
| werde ich ausreichend informiert.                                                      | <input type="checkbox"/> | <input type="checkbox"/> | <input type="checkbox"/> | <input type="checkbox"/> |
| werde ich kompetent beraten.                                                           | <input type="checkbox"/> | <input type="checkbox"/> | <input type="checkbox"/> | <input type="checkbox"/> |
| erhalte ich eine Anleitung zur Umsetzung therapeutischer oder pflegerischer Maßnahmen. | <input type="checkbox"/> | <input type="checkbox"/> | <input type="checkbox"/> | <input type="checkbox"/> |
| werde ich in den Therapieprozess miteingebunden.                                       | <input type="checkbox"/> | <input type="checkbox"/> | <input type="checkbox"/> | <input type="checkbox"/> |
| werde ich psychisch und physisch entlastet.                                            | <input type="checkbox"/> | <input type="checkbox"/> | <input type="checkbox"/> | <input type="checkbox"/> |
| wird mir und dem Betroffenen eine Teilhabe am sozialen Leben ermöglicht.               | <input type="checkbox"/> | <input type="checkbox"/> | <input type="checkbox"/> | <input type="checkbox"/> |

**18) Hat der Betroffene in den letzten 3 Monaten Ergotherapie in Anspruch genommen?**

Hausbesuche zählen auch dazu.

Bitte Entsprechendes ankreuzen.

Nein —————> dann weiter mit Frage 21)

Ja —————> dann weiter mit Frage 19)

**19) Wenn der Betroffene in den letzten 3 Monaten Ergotherapie in Anspruch genommen hat, beantworten Sie bitte folgende Fragen zum zeitlichen Umfang der Behandlung?**

Bitte Entsprechendes ankreuzen und ausfüllen.

Seit wann nimmt der Betroffene Ergotherapie in Anspruch?

Monat                      Jahr

An wie vielen Tagen pro Woche nimmt der Betroffene Ergotherapie in Anspruch?

an  Tagen pro Woche

**An diesen Tagen**, wie lange dauert die Ergotherapie durchschnittlich?

durchschnittlich  Stunden und  Minuten

Wird die Ergotherapie langfristig verordnet d.h. außerhalb des Regelfalles und **ohne** mindestens dreimonatige Therapiepausen?

Nein                       Ja

**20) Als Angehörige, wie beurteilen Sie folgende Aussagen bezüglich der Ergotherapie des Betroffenen?**

Bitte Entsprechendes ankreuzen.

| <b>Durch die Ergotherapie...</b>                                                       | trifft zu                | trifft eher zu           | trifft eher nicht zu     | trifft nicht zu          |
|----------------------------------------------------------------------------------------|--------------------------|--------------------------|--------------------------|--------------------------|
| werde ich ausreichend informiert.                                                      | <input type="checkbox"/> | <input type="checkbox"/> | <input type="checkbox"/> | <input type="checkbox"/> |
| werde ich kompetent beraten.                                                           | <input type="checkbox"/> | <input type="checkbox"/> | <input type="checkbox"/> | <input type="checkbox"/> |
| erhalte ich eine Anleitung zur Umsetzung therapeutischer oder pflegerischer Maßnahmen. | <input type="checkbox"/> | <input type="checkbox"/> | <input type="checkbox"/> | <input type="checkbox"/> |
| werde ich in den Therapieprozess miteingebunden.                                       | <input type="checkbox"/> | <input type="checkbox"/> | <input type="checkbox"/> | <input type="checkbox"/> |
| werde ich psychisch und physisch entlastet.                                            | <input type="checkbox"/> | <input type="checkbox"/> | <input type="checkbox"/> | <input type="checkbox"/> |
| wird mir und dem Betroffenen eine Teilhabe am sozialen Leben ermöglicht.               | <input type="checkbox"/> | <input type="checkbox"/> | <input type="checkbox"/> | <input type="checkbox"/> |

21) Hat der Betroffene in den **letzten 3 Monaten Stimm-, Sprech- und Sprachtherapie** in Anspruch genommen? Hausbesuche zählen auch dazu.

Bitte Entsprechendes ankreuzen.

- Nein —————> dann weiter mit Frage 24)
- Ja —————> dann weiter mit Frage 22)

22) Wenn der Betroffene in den **letzten 3 Monaten Stimm-, Sprech- und Sprachtherapie** in Anspruch genommen hat, beantworten Sie bitte folgende Fragen zum zeitlichen Umfang der Behandlung?

Bitte Entsprechendes ankreuzen und ausfüllen.

Seit wann nimmt der Betroffene Stimm-, Sprech- und Sprachtherapie in Anspruch?

Monat                      Jahr

An wie vielen Tagen pro Woche nimmt der Betroffene Stimm-, Sprech- und Sprachtherapie in Anspruch?

an  Tagen pro Woche

**An diesen Tagen**, wie lange dauert die Stimm-, Sprech- und Sprachtherapie durchschnittlich?

durchschnittlich  Stunden und  Minuten

Wird die Stimm-, Sprech- und Sprachtherapie langfristig verordnet d.h. außerhalb des Regelfalles und **ohne** mindestens dreimonatige Therapiepausen?

Nein                       Ja

**23) Als Angehörige, wie beurteilen Sie folgende Aussagen bezüglich der Stimm-, Sprech- und Sprachtherapie des Betroffenen?**

Bitte Entsprechendes ankreuzen.

| <b>Durch die Stimm-, Sprech- und Sprachtherapie...</b>                                 | trifft zu                | trifft eher zu           | trifft eher nicht zu     | trifft nicht zu          |
|----------------------------------------------------------------------------------------|--------------------------|--------------------------|--------------------------|--------------------------|
| werde ich ausreichend informiert.                                                      | <input type="checkbox"/> | <input type="checkbox"/> | <input type="checkbox"/> | <input type="checkbox"/> |
| werde ich kompetent beraten.                                                           | <input type="checkbox"/> | <input type="checkbox"/> | <input type="checkbox"/> | <input type="checkbox"/> |
| erhalte ich eine Anleitung zur Umsetzung therapeutischer oder pflegerischer Maßnahmen. | <input type="checkbox"/> | <input type="checkbox"/> | <input type="checkbox"/> | <input type="checkbox"/> |
| werde ich in den Therapieprozess miteingebunden.                                       | <input type="checkbox"/> | <input type="checkbox"/> | <input type="checkbox"/> | <input type="checkbox"/> |
| werde ich psychisch und physisch entlastet.                                            | <input type="checkbox"/> | <input type="checkbox"/> | <input type="checkbox"/> | <input type="checkbox"/> |
| wird mir und dem Betroffenen eine Teilhabe am sozialen Leben ermöglicht.               | <input type="checkbox"/> | <input type="checkbox"/> | <input type="checkbox"/> | <input type="checkbox"/> |

**24)** Hat der Betroffene in den **letzten 3 Monaten professionelle Pflege** (gemeint ist damit eine Begleitung durch ausgebildete Fachpflegekräfte) in Anspruch genommen? Hausbesuche zählen auch dazu.

Bitte Entsprechendes ankreuzen.

Nein —> dann weiter mit Frage **27)**

Ja —> dann weiter mit Frage **25)**

**25)** Wenn der Betroffene in den **letzten 3 Monaten professionelle Pflege** in Anspruch genommen hat, beantworten Sie bitte folgende Fragen zum zeitlichen Umfang der Behandlung?

Bitte Entsprechendes ankreuzen und ausfüllen.

Seit wann nimmt der Betroffene professionelle Pflege in Anspruch?

Monat                      Jahr

An wie vielen Tagen pro Woche nimmt der Betroffene professionelle Pflege in Anspruch?

an  Tagen pro Woche

**An diesen Tagen**, wie lange dauert die professionelle Pflege durchschnittlich?

durchschnittlich  Stunden und  Minuten

Findet die professionelle Pflege langfristig d.h. **ohne** Versorgungspausen statt?

Nein                       Ja

**26) Als Angehörige, wie beurteilen Sie folgende Aussagen bezüglich der professionellen Pflege des Betroffenen?**

Bitte Entsprechendes ankreuzen.

| Durch die professionelle Pflege...                                                     | trifft zu                | trifft eher zu           | trifft eher nicht zu     | trifft nicht zu          |
|----------------------------------------------------------------------------------------|--------------------------|--------------------------|--------------------------|--------------------------|
| werde ich ausreichend informiert.                                                      | <input type="checkbox"/> | <input type="checkbox"/> | <input type="checkbox"/> | <input type="checkbox"/> |
| werde ich kompetent beraten.                                                           | <input type="checkbox"/> | <input type="checkbox"/> | <input type="checkbox"/> | <input type="checkbox"/> |
| erhalte ich eine Anleitung zur Umsetzung therapeutischer oder pflegerischer Maßnahmen. | <input type="checkbox"/> | <input type="checkbox"/> | <input type="checkbox"/> | <input type="checkbox"/> |
| werde ich in den Therapieprozess miteingebunden.                                       | <input type="checkbox"/> | <input type="checkbox"/> | <input type="checkbox"/> | <input type="checkbox"/> |
| werde ich psychisch und physisch entlastet.                                            | <input type="checkbox"/> | <input type="checkbox"/> | <input type="checkbox"/> | <input type="checkbox"/> |
| wird mir und dem Betroffenen eine Teilhabe am sozialen Leben ermöglicht.               | <input type="checkbox"/> | <input type="checkbox"/> | <input type="checkbox"/> | <input type="checkbox"/> |

**27) Hat der Betroffene in den letzten 3 Monaten sonstige therapeutische Angebote (z.B. Musiktherapie, tiergestützte Therapie) in Anspruch genommen? Hausbesuche zählen auch dazu.**

Bitte geben Sie die sonstigen therapeutischen Angebote die der Betroffene in Anspruch genommen hat zunächst ein, und geben Sie weiterhin an, wie oft der Betroffene diese Angebote wahrgenommen hat.

Bitte Entsprechendes ankreuzen und ausfüllen.

Nein

Ja →

| Sonstiges therapeutisches Angebot | Wie oft?             |
|-----------------------------------|----------------------|
| _____                             | <input type="text"/> |
| _____                             | <input type="text"/> |
| _____                             | <input type="text"/> |



**28) Hat der Betroffene in den letzten 3 Monaten Leistungen eines multidisziplinären Reha-Teams in Anspruch genommen? Hausbesuche zählen auch dazu.**

Gemeint ist die Inanspruchnahme verschiedener rehabilitativer Leistungen (z.B. Physio- und Ergotherapie), auch wenn die Pflegekräfte und Therapeuten aus verschiedenen Einrichtung stammen oder externe Pflegekräfte und Therapeuten zur Verstärkung des Reha-Teams hinzugezogen werden.

Bitte Entsprechendes ankreuzen.

Nein → dann weiter mit Frage 34)

Ja → dann weiter mit Frage 33)

**29) Als Angehörige, wie beurteilen Sie folgende Aussagen bezüglich der Zusammenarbeit innerhalb des Reha-Teams?**

Bitte Entsprechendes ankreuzen.

| Das Reha-Team...                                                                                                 | trifft zu                | trifft eher zu           | trifft eher nicht zu     | trifft nicht zu          | weiß nicht               |
|------------------------------------------------------------------------------------------------------------------|--------------------------|--------------------------|--------------------------|--------------------------|--------------------------|
| verfolgt eine gemeinsame Pflege- und Therapieplanung.                                                            | <input type="checkbox"/> | <input type="checkbox"/> | <input type="checkbox"/> | <input type="checkbox"/> | <input type="checkbox"/> |
| verwendet eine gemeinsame Dokumentation.                                                                         | <input type="checkbox"/> | <input type="checkbox"/> | <input type="checkbox"/> | <input type="checkbox"/> | <input type="checkbox"/> |
| gestaltet gemeinsame Team- und Fallbesprechungen.                                                                | <input type="checkbox"/> | <input type="checkbox"/> | <input type="checkbox"/> | <input type="checkbox"/> | <input type="checkbox"/> |
| arbeitet fachübergreifend mit dem Betroffenen (z.B. Behandlung mit zwei Therapeuten unterschiedlicher Disziplin) | <input type="checkbox"/> | <input type="checkbox"/> | <input type="checkbox"/> | <input type="checkbox"/> | <input type="checkbox"/> |
| arbeitet nach einer gemeinsamen konzeptionellen Ausrichtung.                                                     | <input type="checkbox"/> | <input type="checkbox"/> | <input type="checkbox"/> | <input type="checkbox"/> | <input type="checkbox"/> |
| Eine Zusammenarbeit innerhalb des Reha-Teams ist für mich <b>nicht</b> ersichtlich.                              | <input type="checkbox"/> | <input type="checkbox"/> | <input type="checkbox"/> | <input type="checkbox"/> | <input type="checkbox"/> |

**30)** Müssen für die Versorgung des Betroffenen eigene Finanzmittel des Haushalts aufgewendet werden? Zuzahlungen der gesetzlichen Krankenversicherung zählen auch dazu.

Bitte Entsprechendes ankreuzen und ausfüllen.

Nein

Ja →

Wenn ja, wie viel Euro pro Monat müssen durchschnittlich aufgewendet werden?

durchschnittlich     Euro pro Monat

**31)** Wann ist der Betroffene geboren?

Tag

Monat

Jahr

**32)** Welches Geschlecht hat der Betroffene?

weiblich

männlich

**33)** Welchen Familienstand hat der Betroffene?

verheiratet

ledig

geschieden

verwitwet

**34) Welches ist der **höchste** Schulabschluss des Betroffenen?**

|                                      |                          |
|--------------------------------------|--------------------------|
| Hauptschule/Volksschule              | <input type="checkbox"/> |
| Mittlere Reife/Realschule            | <input type="checkbox"/> |
| Abitur/Fachabitur/Fachhochschulreife | <input type="checkbox"/> |
| kein Abschluss                       | <input type="checkbox"/> |
| Sonstiger Abschluss                  | <input type="text"/>     |

**35) Welches ist der **höchste** berufsbildende Schulabschluss des Betroffenen?**

|                                       |                          |
|---------------------------------------|--------------------------|
| Berufsschule (Lehre)                  | <input type="checkbox"/> |
| Fachschule/Techniker-/Meisterschule   | <input type="checkbox"/> |
| Ingenieur-Schule/Polytechnikum        | <input type="checkbox"/> |
| Hochschule/Fachhochschule/Universität | <input type="checkbox"/> |
| kein Abschluss                        | <input type="checkbox"/> |
| Sonstiger Abschluss                   | <input type="text"/>     |

**36) Bitte schätzen Sie ein, wie schwierig es für Sie war, den Fragebogen auszufüllen.**

|                      |                          |
|----------------------|--------------------------|
| sehr einfach         | <input type="checkbox"/> |
| einfach              | <input type="checkbox"/> |
| schwierig            | <input type="checkbox"/> |
| sehr schwierig       | <input type="checkbox"/> |
| ohne Hilfe unmöglich | <input type="checkbox"/> |

**37) Wie viel Zeit haben Sie ungefähr benötigt, um den Fragebogen auszufüllen?**

|                                                   |
|---------------------------------------------------|
| <input type="text"/> <input type="text"/> Minuten |
|---------------------------------------------------|

**38)** Wenn Sie möchten, können Sie hier noch Kommentare zum Inhalt, Schwierigkeitsgrad, zur Übersichtlichkeit des Fragebogens oder Ähnliches einfügen.

Sollten Sie Anmerkungen zu einzelnen Fragen des Fragebogens haben, geben Sie bitte die Nummer der Frage auf die sich Ihre Anmerkung bezieht mit an.

Bitte tragen Sie hier Ihre Kommentare ein.

---

---

---

---

---

---

---

---

**39)** Bitte geben Sie das heutige Datum an.

Heutiges Datum

Tag      Monat      Jahr

Bitte prüfen Sie, ob Sie keine Frage übersehen haben.

**Vielen Dank für Ihre Unterstützung!**
