# Supplementary material for: RECAPDOC - a questionnaire for the documentation of rehabilitation care utilization in individuals with disorders of consciousness in long-term care in Germany: development and pretesting
Source: PubMed Central journal article supplement (PMC5936017; doi:10.1186/s12913-018-3153-3), 2018-05-04
Supplement: 12913_2018_3153_MOESM4_ESM.pdf [file 12913_2018_3153_MOESM4_ESM.pdf]

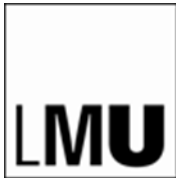

LUDWIG-  
MAXIMILIANS-  
UNIVERSITÄT  
MÜNCHEN

INSTITUT FÜR MEDIZINISCHE  
INFORMATIONSVERRARBEITUNG, BIOMETRIE  
UND EPIDEMIOLOGIE

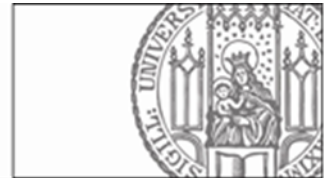

# RECAPDOC

## Questionnaire for the documentation of rehabilitation care utilization in individuals with disorders of consciousness in long-term care

© Institute for Medical Information Processing, Biometrics and Epidemiology (IBE)  
Ludwig-Maximilians-Universität München, Germany

Contact: [martin.mueller@fh-rosenheim.de](mailto:martin.mueller@fh-rosenheim.de)

Funded by Deutsche Forschungsgemeinschaft

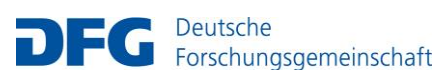

## Instructions for completing the questionnaire

Please do not let the length of the questionnaire discourage you!  
You will need about 20 minutes to complete the questionnaire.

### Here is how to do it!

#### Please complete the questionnaire by

- writing an X in the desired answer choice

*Example:* No  Yes

- Enter in the fields

*Example:* on average  Hour und   Minutes

- Enter answer in your own writing on the given line

*Example:* Other: Assisted Living

The questionnaire asks about different time periods (3 months and 12 months). Please pay attention and read carefully which respective period of time is being referred to, and please use a calendar to determine the time period in question.

Please proceed in order and answer all questions if possible.

Thank you very much!

- 1) What is the main diagnosis underlying the patient's consciousness disorder?  
Please cross the appropriate box.

|                                                        |                          |
|--------------------------------------------------------|--------------------------|
| Traumatic Brain Injury                                 | <input type="checkbox"/> |
| Stroke                                                 | <input type="checkbox"/> |
| Cerebral haemorrhage (intracerebral or subarachnoidal) | <input type="checkbox"/> |
| Oxygen deficiency in the brain                         | <input type="checkbox"/> |
| Other: _____                                           | <input type="checkbox"/> |

- 2) When was the date of injury of the person concerned?

|                                           |                                           |                                                                                     |
|-------------------------------------------|-------------------------------------------|-------------------------------------------------------------------------------------|
| <input type="text"/> <input type="text"/> | <input type="text"/> <input type="text"/> | <input type="text"/> <input type="text"/> <input type="text"/> <input type="text"/> |
| Day                                       | Month                                     | Year                                                                                |

- 3) When was the patient discharged from inpatient rehabilitation?

|                                           |                                           |                                                                                     |
|-------------------------------------------|-------------------------------------------|-------------------------------------------------------------------------------------|
| <input type="text"/> <input type="text"/> | <input type="text"/> <input type="text"/> | <input type="text"/> <input type="text"/> <input type="text"/> <input type="text"/> |
| Day                                       | Month                                     | Year                                                                                |

- 4) Where does the person concerned **currently** live?

Please cross the appropriate box.

|                                                                             |                          |
|-----------------------------------------------------------------------------|--------------------------|
| <b>Private household</b>                                                    | <input type="checkbox"/> |
| <b>Senior/Nursing home</b>                                                  | <input type="checkbox"/> |
| <b>Special care facility for people with severe consciousness disorders</b> | <input type="checkbox"/> |
| <b>Assisted living residence</b>                                            | <input type="checkbox"/> |
| Other: _____                                                                | <input type="checkbox"/> |

5) Has the person concerned used a home care service in the **last 3 months**?

Please cross and fill out the appropriate form.

No

Yes →

If yes, since when does the person concerned use the home care service?

Month Year

On how many days a week did the person concerned use the home care service?

on  Days per week

**On those days**, how long was the home care service on average at the person of concern's home?

On average  Hours and  Minutes

6) Has the person concerned used paid household or extended care in the **last 3 months**?

Please cross and fill out the appropriate form.

No

Yes →

If yes, since when does the person concerned use the paid household or extended care?

Month Year

On how many days a week did the person concerned use the paid household or extended care?

on  Days per week

**On those days**, how long was the paid household or extended care at the person of concern's home?

On average  Hours and  Minutes

7) Has the person concerned used help from family members, friends, acquaintances or neighbors in the **last 3 months**?

Examples of help are: household help, personal hygiene, dressing and undressing, taking medication, shopping, and driving

Please cross and fill out the appropriate form.

- No
- Yes →

If yes, since when does the person concerned use this help?

                  
Month          Year

On how many days a week did the person concerned use this help?

on    Days per week

**On those days**, how long was the person on average helped?

on average        Hours and        Minutes

8) Did the person concerned stay in a semi-residential care facility (day care) in the **last 3 months**?

Please cross and fill out the appropriate form

- No
- Yes →

If so, since when does the person concerned visit this semi-residential care facility (day care)?

                  
Month          Year

On how many days a week did the person concerned visit the semi-residential care facility (day care)?

on    Days per week

**On those days**, how long did the person concerned visit the semi-residential care facility (day care) on average?

on average        Hours and        Minutes

9) Does the person concerned receive benefits from the statutory long-term care insurance?

Please cross and fill out the appropriate form.

Nein

Ja →

If yes, which level of care does the person concerned have?

Level of care

If you do not know the care level of the person concerned: What is the monthly care allowance?

|                      |                      |                      |                      |                      |      |
|----------------------|----------------------|----------------------|----------------------|----------------------|------|
| <input type="text"/> | <input type="text"/> | <input type="text"/> | <input type="text"/> | <input type="text"/> | Euro |
|----------------------|----------------------|----------------------|----------------------|----------------------|------|

If the person concerned is in care level 3: Is the hardship clause (higher allowance in kind) used?

Hardship provision: No

Yes

Do not know

10) Does the person concerned receive benefits from the statutory accident insurance?

Please cross the appropriate box.

No

Yes

11) How is the person concerned covered by health insurance?

Please cross the appropriate box.

Statutory health insurance

Through assistance and privately insured (civil servant status)

Private insurance (only full insurance, no additional insurance)

No health insurance

**12) Has the person concerned visited one of the following doctors in the last 3 months?**

This refers to any contact with the doctor's office, even if the doctor himself was not spoken to (for example picking up a prescription, taking blood). Home visits are also included.

Please cross first whether the person concerned has visited the respective doctor (yes or no). If yes, please continue to state how often the person has visited this doctor.

| Doctor                                                                                                          | No                       | Yes                      | How often?                                        |
|-----------------------------------------------------------------------------------------------------------------|--------------------------|--------------------------|---------------------------------------------------|
| General practitioner, family doctor, or primary care internist                                                  | <input type="checkbox"/> | <input type="checkbox"/> | <input type="checkbox"/> <input type="checkbox"/> |
| Specialist internist (e.g., cardiologist, gastroenterologist, nephrologist, diabetologist, pulmonologist, etc.) | <input type="checkbox"/> | <input type="checkbox"/> | <input type="checkbox"/> <input type="checkbox"/> |
| Gynecologist                                                                                                    | <input type="checkbox"/> | <input type="checkbox"/> | <input type="checkbox"/> <input type="checkbox"/> |
| Surgeon                                                                                                         | <input type="checkbox"/> | <input type="checkbox"/> | <input type="checkbox"/> <input type="checkbox"/> |
| Orthopedist                                                                                                     | <input type="checkbox"/> | <input type="checkbox"/> | <input type="checkbox"/> <input type="checkbox"/> |
| Neurologist / Psychiatrist                                                                                      | <input type="checkbox"/> | <input type="checkbox"/> | <input type="checkbox"/> <input type="checkbox"/> |
| Dermatologist                                                                                                   | <input type="checkbox"/> | <input type="checkbox"/> | <input type="checkbox"/> <input type="checkbox"/> |
| Ophthalmologist                                                                                                 | <input type="checkbox"/> | <input type="checkbox"/> | <input type="checkbox"/> <input type="checkbox"/> |
| Urologist                                                                                                       | <input type="checkbox"/> | <input type="checkbox"/> | <input type="checkbox"/> <input type="checkbox"/> |
| Dentist                                                                                                         | <input type="checkbox"/> | <input type="checkbox"/> | <input type="checkbox"/> <input type="checkbox"/> |
| Psychotherapist                                                                                                 | <input type="checkbox"/> | <input type="checkbox"/> | <input type="checkbox"/> <input type="checkbox"/> |
| Outpatient treatment in the hospital (for example: consultation, emergency care, before- and after surgery)     | <input type="checkbox"/> | <input type="checkbox"/> | <input type="checkbox"/> <input type="checkbox"/> |
| Special outpatient clinic for people with severe consciousness disorders                                        | <input type="checkbox"/> | <input type="checkbox"/> | <input type="checkbox"/> <input type="checkbox"/> |
| Other: <input type="text"/>                                                                                     | <input type="checkbox"/> | <input type="checkbox"/> | <input type="checkbox"/> <input type="checkbox"/> |

**13) Has a brainwave current measurement (EEG, electroencephalography) been performed on the person concerned in the last 3 months?**

Please cross the appropriate box.

No
  Yes

**14)** Does the person concerned have one or more of the following **medical aids or devices**? This includes purchased or borrowed aids or devices.  
 Please first cross the box whether the person concerned has each aid or device.  
 If so, please continue to indicate if the person concerned used the aid or device in the **last 3 months**.

| Aid or Device                                         | No                       | Yes, he/she owns this    | Yes, he/she has used it in the last 3 months |
|-------------------------------------------------------|--------------------------|--------------------------|----------------------------------------------|
| Wheelchair, multifunctional or nursing wheelchair     | <input type="checkbox"/> | <input type="checkbox"/> | <input type="checkbox"/>                     |
| Transfer aids, e.g hoist                              | <input type="checkbox"/> | <input type="checkbox"/> | <input type="checkbox"/>                     |
| Standing aids, e.g. standing boards                   | <input type="checkbox"/> | <input type="checkbox"/> | <input type="checkbox"/>                     |
| Walking aids, e.g. wheeled walker                     | <input type="checkbox"/> | <input type="checkbox"/> | <input type="checkbox"/>                     |
| Bathing aids, e.g. shower couch or bathtub seats/mats | <input type="checkbox"/> | <input type="checkbox"/> | <input type="checkbox"/>                     |
| Toilet aids, e.g. commode chair                       | <input type="checkbox"/> | <input type="checkbox"/> | <input type="checkbox"/>                     |
| Hospital bed (height adjustable)                      | <input type="checkbox"/> | <input type="checkbox"/> | <input type="checkbox"/>                     |
| Positioning aids, e.g. pillows, wedges                | <input type="checkbox"/> | <input type="checkbox"/> | <input type="checkbox"/>                     |
| Tracheostomy equipment                                | <input type="checkbox"/> | <input type="checkbox"/> | <input type="checkbox"/>                     |
| Suction units                                         | <input type="checkbox"/> | <input type="checkbox"/> | <input type="checkbox"/>                     |
| Ventilator                                            | <input type="checkbox"/> | <input type="checkbox"/> | <input type="checkbox"/>                     |
| Inhalation devices                                    | <input type="checkbox"/> | <input type="checkbox"/> | <input type="checkbox"/>                     |
| Feeding tube, e.g. PEG-tube                           | <input type="checkbox"/> | <input type="checkbox"/> | <input type="checkbox"/>                     |
| Feeding pump                                          | <input type="checkbox"/> | <input type="checkbox"/> | <input type="checkbox"/>                     |
| Communication devices e.g. technical, symbolic        | <input type="checkbox"/> | <input type="checkbox"/> | <input type="checkbox"/>                     |
| Orthoses or splints                                   | <input type="checkbox"/> | <input type="checkbox"/> | <input type="checkbox"/>                     |
| Aids for incontinence care                            | <input type="checkbox"/> | <input type="checkbox"/> | <input type="checkbox"/>                     |
| Other: _____                                          | <input type="checkbox"/> | <input type="checkbox"/> | <input type="checkbox"/>                     |
| Other: _____                                          | <input type="checkbox"/> | <input type="checkbox"/> | <input type="checkbox"/>                     |



15) Has the person concerned had any **physical therapy in the last 3 months**?

Home visits are also included.

Please cross the appropriate box.

No → then continue with question 18)

Yes → then continue with question 16)

16) If the person concerned has had any **physical therapy in the last 3 months**, please answer the following questions about the duration of the treatment.

Please cross and fill out the appropriate form.

Since when has the person concerned started physical therapy?

Month Year

On how many days per week does the person concerned have physical therapy?

on  days per week

**On those days**, how long did the physical therapy last on average?

on average  Hours and  Minutes

Was the physical therapy prescribed on a long-term basis? i.e. more than a usual case and **without** at least a three month therapy break?

No  Yes

**17) As a family member, relative or legal guardian,** how would you rate the following statements regarding the **physical therapy** of the person concerned?

Please cross the appropriate box.

| <b>Through the Physical therapy....</b>                                   | true                     | rather true              | rather not true          | not true                 |
|---------------------------------------------------------------------------|--------------------------|--------------------------|--------------------------|--------------------------|
| I was sufficiently informed.                                              | <input type="checkbox"/> | <input type="checkbox"/> | <input type="checkbox"/> | <input type="checkbox"/> |
| I was given competent advice.                                             | <input type="checkbox"/> | <input type="checkbox"/> | <input type="checkbox"/> | <input type="checkbox"/> |
| I received a guide on how to implement therapeutic or nursing procedures. | <input type="checkbox"/> | <input type="checkbox"/> | <input type="checkbox"/> | <input type="checkbox"/> |
| I was involved in the therapy process.                                    | <input type="checkbox"/> | <input type="checkbox"/> | <input type="checkbox"/> | <input type="checkbox"/> |
| I was relieved mentally and physically.                                   | <input type="checkbox"/> | <input type="checkbox"/> | <input type="checkbox"/> | <input type="checkbox"/> |
| the person concerned and I were enabled to partake in social activities.  | <input type="checkbox"/> | <input type="checkbox"/> | <input type="checkbox"/> | <input type="checkbox"/> |

**18)** Has the person concerned had any **occupational therapy in the last 3 months?**

Home visits are also included.

Please cross the appropriate box.

No → then continue with question **21)**

Yes → then continue with question **19)**

**19)** If the person concerned has had any **occupational therapy in the last 3 months**, please answer the following questions about the duration of the treatment.

Please cross and fill out the appropriate form.

Since when has the person concerned started occupational therapy?

Month Year

On how many days per week does the person concerned have occupational therapy?

on  Days per week

**On those days**, how long did the occupational therapy last on average?

on average  Hours and  Minutes

Was the occupational therapy prescribed on a long-term basis? i.e. more than a usual case and **without** at least a three month therapy break?

No  Yes

**20) As a family member, relative or legal guardian,** how would you rate the following statements regarding the **occupational therapy** of the person concerned?

Please cross and fill out the appropriate form.

| Through the occupational therapy...                                       | true                     | rather true              | rather not true          | not true                 |
|---------------------------------------------------------------------------|--------------------------|--------------------------|--------------------------|--------------------------|
| I was sufficiently informed.                                              | <input type="checkbox"/> | <input type="checkbox"/> | <input type="checkbox"/> | <input type="checkbox"/> |
| I was given competent advice.                                             | <input type="checkbox"/> | <input type="checkbox"/> | <input type="checkbox"/> | <input type="checkbox"/> |
| I received a guide on how to implement therapeutic or nursing procedures. | <input type="checkbox"/> | <input type="checkbox"/> | <input type="checkbox"/> | <input type="checkbox"/> |
| I was involved in the therapy process.                                    | <input type="checkbox"/> | <input type="checkbox"/> | <input type="checkbox"/> | <input type="checkbox"/> |
| I was relieved mentally and physically.                                   | <input type="checkbox"/> | <input type="checkbox"/> | <input type="checkbox"/> | <input type="checkbox"/> |
| the person concerned and I were enabled to partake in social activities.  | <input type="checkbox"/> | <input type="checkbox"/> | <input type="checkbox"/> | <input type="checkbox"/> |

21) Has the person concerned had any **voice, speech or language therapy in the last 3 months**? Home visits are also included.

Please cross the appropriate box.

- No —————> then continue with question 24)
- Yes —————> then continue with question 22)

22) If the person concerned has had any **voice, speech or language therapy in the last 3 months**, please answer the following questions about the duration of the treatment.

Please cross and fill out the appropriate form.

Since when has the person concerned started the voice, speech or language therapy?

Month                      Year

On how many days per week does the person concerned have voice, speech or language therapy?

on  days per week

**On those days**, how long did the voice, speech or language therapy last on average?

on average  Hours and  Minutes

Was the voice, speech or language therapy prescribed on a long-term basis? i.e. more than a usual case and **without** at least a three month therapy break?

No                       Yes

**23) As a family member, relative or legal guardian,** how would you rate the following statements regarding the **voice, speech or language therapy** of the person concerned?

Please cross and fill out the appropriate form.

| <b>Through the voice, speech or language therapy...</b>                   | true                     | rather true              | rather not true          | not true                 |
|---------------------------------------------------------------------------|--------------------------|--------------------------|--------------------------|--------------------------|
| I was sufficiently informed.                                              | <input type="checkbox"/> | <input type="checkbox"/> | <input type="checkbox"/> | <input type="checkbox"/> |
| I was given competent advice.                                             | <input type="checkbox"/> | <input type="checkbox"/> | <input type="checkbox"/> | <input type="checkbox"/> |
| I received a guide on how to implement therapeutic or nursing procedures. | <input type="checkbox"/> | <input type="checkbox"/> | <input type="checkbox"/> | <input type="checkbox"/> |
| I was involved in the therapy process.                                    | <input type="checkbox"/> | <input type="checkbox"/> | <input type="checkbox"/> | <input type="checkbox"/> |
| I was relieved mentally and physically.                                   | <input type="checkbox"/> | <input type="checkbox"/> | <input type="checkbox"/> | <input type="checkbox"/> |
| the person concerned and I were enabled to partake in social activities.  | <input type="checkbox"/> | <input type="checkbox"/> | <input type="checkbox"/> | <input type="checkbox"/> |

**24)** Has the person concerned received any **professional nursing care in the last 3 months** (i.e. a registered nurse)? Home visits are also included.

Please cross the appropriate box.

No —————> then continue with question **27)**

Yes —————> then continue with question **25)**

**25)** If the person concerned has received any **professional nursing care in the last 3 months**, please answer the following questions about the duration of the treatment.

Please cross and fill out the appropriate form.

Since when has the person concerned received professional nursing care?

Month Year

On how many days per week does the person concerned receive professional nursing care?

on  days per week

**On those days**, how long did the professional nursing care last on average?

on average  Hours and  Minutes

Does the professional nursing care take place on a long-term basis?

No  Yes

**26) As a family member, relative or legal guardian, how would you rate the following statements regarding the professional nursing care received from the person concerned?**

Please cross and fill out the appropriate form.

| Through the professional nursing care...                                  | true                     | rather true              | rather not true          | not true                 |
|---------------------------------------------------------------------------|--------------------------|--------------------------|--------------------------|--------------------------|
| I was sufficiently informed.                                              | <input type="checkbox"/> | <input type="checkbox"/> | <input type="checkbox"/> | <input type="checkbox"/> |
| I was given competent advice.                                             | <input type="checkbox"/> | <input type="checkbox"/> | <input type="checkbox"/> | <input type="checkbox"/> |
| I received a guide on how to implement therapeutic or nursing procedures. | <input type="checkbox"/> | <input type="checkbox"/> | <input type="checkbox"/> | <input type="checkbox"/> |
| I was involved in the therapy process.                                    | <input type="checkbox"/> | <input type="checkbox"/> | <input type="checkbox"/> | <input type="checkbox"/> |
| I was relieved mentally and physically.                                   | <input type="checkbox"/> | <input type="checkbox"/> | <input type="checkbox"/> | <input type="checkbox"/> |
| the person concerned and I were enabled to partake in social activities.  | <input type="checkbox"/> | <input type="checkbox"/> | <input type="checkbox"/> | <input type="checkbox"/> |

**27) Has the person concerned had any other therapies (eg music therapy, animal-assisted therapy) in the last 3 months? Home visits are also included.**

Please first enter the other therapies that the person concerned has had, and continue to indicate how often the person concerned has received these therapies.

Please cross and fill out the appropriate form.

No

Yes →

| Other therapies | How often?                                                                 |
|-----------------|----------------------------------------------------------------------------|
| _____           | <input type="checkbox"/> <input type="checkbox"/> <input type="checkbox"/> |
| _____           | <input type="checkbox"/> <input type="checkbox"/> <input type="checkbox"/> |
| _____           | <input type="checkbox"/> <input type="checkbox"/> <input type="checkbox"/> |



**28) Has the person concerned used the services of a multidisciplinary rehabilitation team in the last 3 months?** Home visits are also included.

This refers to the use of various rehabilitative services (such as physiotherapy and occupational therapy), even if the nurses and therapists come from different institutions or external nurses and therapists are called in to strengthen the rehabilitation team.

Please cross the appropriate box.

- No → then continue with question **34)**  
 Yes → then continue with question **33)**

**29) As a family member, relative or legal guardian,** how would you rate the following statements regarding the **cooperation between the rehabilitation teams?**

Please cross and fill out the appropriate form.

| The rehabilitation team...                                                                                        | true                     | rather true              | rather not true          | not true                 | Don't know               |
|-------------------------------------------------------------------------------------------------------------------|--------------------------|--------------------------|--------------------------|--------------------------|--------------------------|
| follows a joint care and therapy plan.                                                                            | <input type="checkbox"/> | <input type="checkbox"/> | <input type="checkbox"/> | <input type="checkbox"/> | <input type="checkbox"/> |
| uses joint documentation.                                                                                         | <input type="checkbox"/> | <input type="checkbox"/> | <input type="checkbox"/> | <input type="checkbox"/> | <input type="checkbox"/> |
| designs joint team and case discussions.                                                                          | <input type="checkbox"/> | <input type="checkbox"/> | <input type="checkbox"/> | <input type="checkbox"/> | <input type="checkbox"/> |
| works interdisciplinarily with the person concerned (e.g. treatment with two therapists of different disciplines) | <input type="checkbox"/> | <input type="checkbox"/> | <input type="checkbox"/> | <input type="checkbox"/> | <input type="checkbox"/> |
| works according to a common care plan.                                                                            | <input type="checkbox"/> | <input type="checkbox"/> | <input type="checkbox"/> | <input type="checkbox"/> | <input type="checkbox"/> |
| Collaboration within the rehab team is not apparent to me.                                                        | <input type="checkbox"/> | <input type="checkbox"/> | <input type="checkbox"/> | <input type="checkbox"/> | <input type="checkbox"/> |

**30)** Does the household need to spend its own financial resources for the care of the person concerned? Co-payments of the statutory health insurance are also included.

Please cross and fill out the appropriate form.

No

Yes →

If yes, how much in Euro per month is spent on average?

on average  Euro per month

**31)** When was the person concerned born?

Day     Month     Year

**32)** What is the gender of the person concerned?

female

male

**33)** What is the marital status of the person concerned?

married

single

divorced

widowed

**34) Which is the highest school degree earned of the person concerned?**

|                                                                 |                          |
|-----------------------------------------------------------------|--------------------------|
| [to be defined according the countries' specific school system] | <input type="checkbox"/> |
|                                                                 | <input type="checkbox"/> |
|                                                                 | <input type="checkbox"/> |
| No degree                                                       | <input type="checkbox"/> |
| Other degree                                                    | <input type="text"/>     |

**35) What is the highest vocational qualification of the person concerned?**

|                                                     |                          |
|-----------------------------------------------------|--------------------------|
| Vocational training                                 | <input type="checkbox"/> |
| Technical school/Technician/Master craftsmen school | <input type="checkbox"/> |
| Engineering School/ Polytechnic school              | <input type="checkbox"/> |
| Higher education institution/ University degree     | <input type="checkbox"/> |
| No Qualification                                    | <input type="checkbox"/> |
| Other Qualification                                 | <input type="text"/>     |

**36) Please estimate how difficult it was for you to complete the questionnaire.**

|                         |                          |
|-------------------------|--------------------------|
| very easy               | <input type="checkbox"/> |
| easy                    | <input type="checkbox"/> |
| difficult               | <input type="checkbox"/> |
| very difficult          | <input type="checkbox"/> |
| impossible without help | <input type="checkbox"/> |

**37) How much time did you need to complete the questionnaire?**

|                                                   |
|---------------------------------------------------|
| <input type="text"/> <input type="text"/> Minutes |
|---------------------------------------------------|

**38)** If you wish, you can add comments on the content, level of difficulty, and clarity of the questionnaire or something similar.

If you have comments on individual questionnaire questions, please include the number of the specific question to which your comment refers to.

Please enter any comments here.

---

---

---

---

---

---

---

---

**39)** Please enter today's date.

Today's Date             

Day                      Month                      Year

Please double check that you have not missed a question!

**Thank you for your support!**
